# Supplementary material
Source: Springer Nature journal article supplement (https://www.springermedizin.de/resource/supplementary/12916_2010_363_MOESM3_ESM.pdf/9599746)

Original sequence (color shows homology with template sequence below)

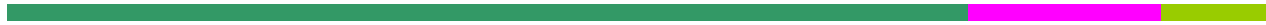

Homologous (but non-allelic) template sequence

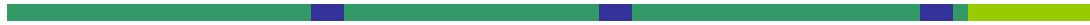

Original sequence experiences double strand break

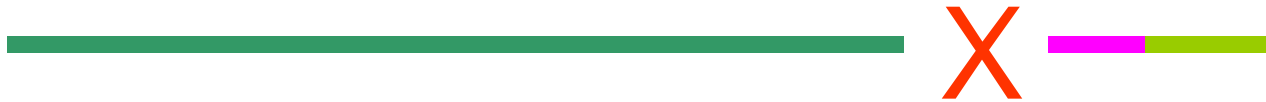

Formation of heteroduplex intermediate

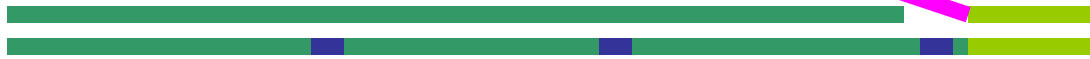

Possible repair outcome

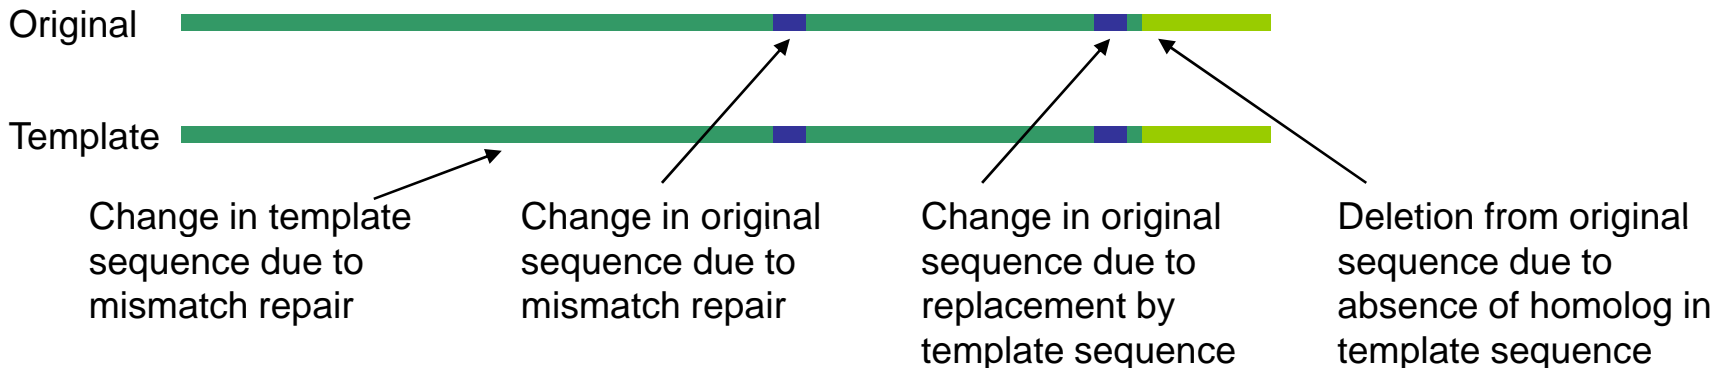

Supplement: MOESM3 [file 9599746]
